# Supplementary material for: Anti-Inflammatory Azaphilones from the Edible Alga-Derived Fungus Penicillium sclerotiorum
Source: MDPI journal article supplement (doi:10.3390/md19100529), 2021-09-22

## Supporting Information

### Anti-Inflammatory Azaphilones from the Edible Alga-Derived Fungus *Penicillium sclerotiorum*

Hui-Chun Wang, Tzu-Yi Ke, Ya-Chen Ko, Jue-Jun Lin, Jui-Sheng Chang, and Yuan-Bin Cheng\*

#### Table of Contents

|                                                                                                     |    |
|-----------------------------------------------------------------------------------------------------|----|
| Figure S1 <sup>1</sup> H NMR spectrum of <b>1</b> (CDCl <sub>3</sub> , 600 MHz).....                | 2  |
| Figure S2 <sup>13</sup> C NMR and DEPT spectrum of <b>1</b> (CDCl <sub>3</sub> , 150 MHz).....      | 3  |
| Figure S3 COSY spectrum of <b>1</b> .....                                                           | 4  |
| Figure S4 HSQC spectrum of <b>1</b> .....                                                           | 5  |
| Figure S5 HMBC spectrum of <b>1</b> .....                                                           | 6  |
| Figure S6 NOESY spectrum of <b>1</b> .....                                                          | 7  |
| Figure S7 <sup>1</sup> H NMR spectrum of <b>2</b> (CDCl <sub>3</sub> , 600 MHz).....                | 8  |
| Figure S8 <sup>13</sup> C NMR and DEPT spectrum of <b>2</b> (CDCl <sub>3</sub> , 150 MHz).....      | 9  |
| Figure S9 COSY spectrum of <b>2</b> .....                                                           | 10 |
| Figure S10 HSQC spectrum of <b>2</b> .....                                                          | 11 |
| Figure S11 HMBC spectrum of <b>2</b> .....                                                          | 12 |
| Figure S12 NOESY spectrum of <b>2</b> .....                                                         | 13 |
| Figure S13 HRESIMS spectrum of <b>1</b> .....                                                       | 14 |
| Figure S14 HRESIMS spectrum of <b>2</b> .....                                                       | 15 |
| Table S1 the <sup>1</sup> H and <sup>13</sup> C data of the sidechain of compounds <b>1–4</b> ..... | 16 |
| Figure S15 IR spectrum of <b>1</b> .....                                                            | 17 |
| Figure S16 UV spectrum of <b>1</b> .....                                                            | 17 |
| Figure S17 IR spectrum of <b>2</b> .....                                                            | 18 |
| Figure S18 UV spectrum of <b>2</b> .....                                                            | 18 |

Figure S1  $^1\text{H}$  NMR spectrum of **1** ( $\text{CDCl}_3$ , 600 MHz)

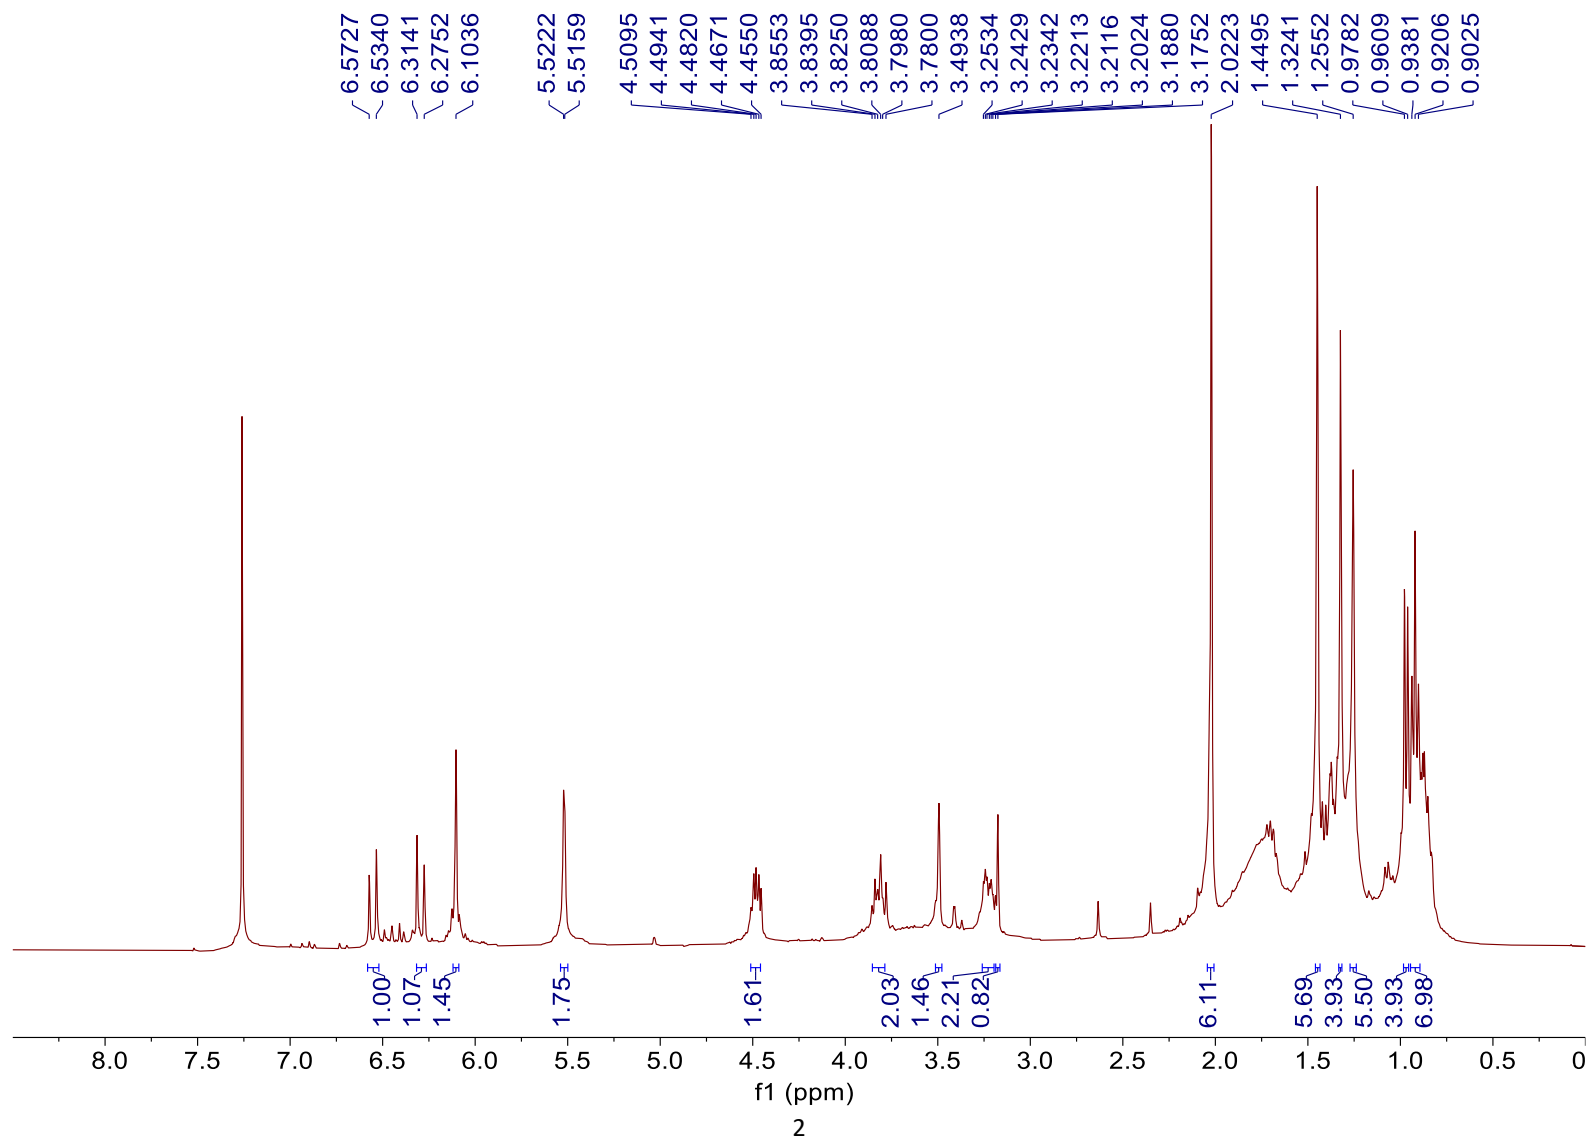

Figure S2  $^{13}\text{C}$  NMR and DEPT spectrum of **1** ( $\text{CDCl}_3$ , 150 MHz).

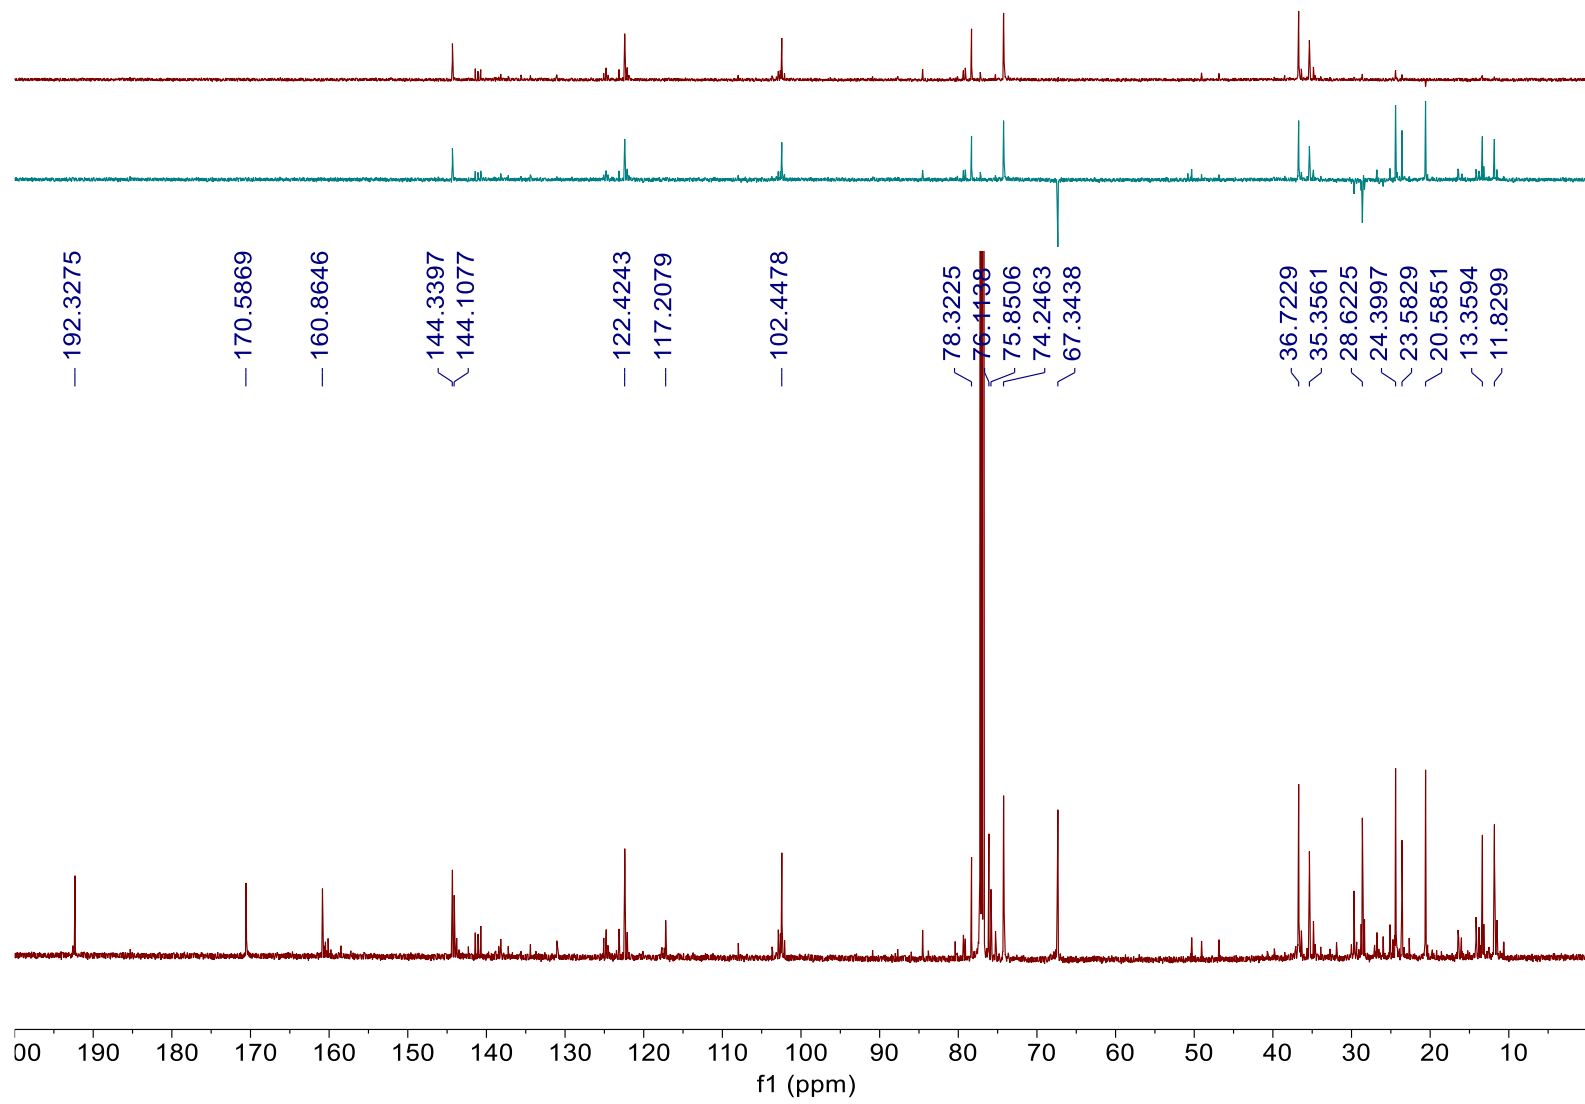

Figure S3 COSY spectrum of **1**

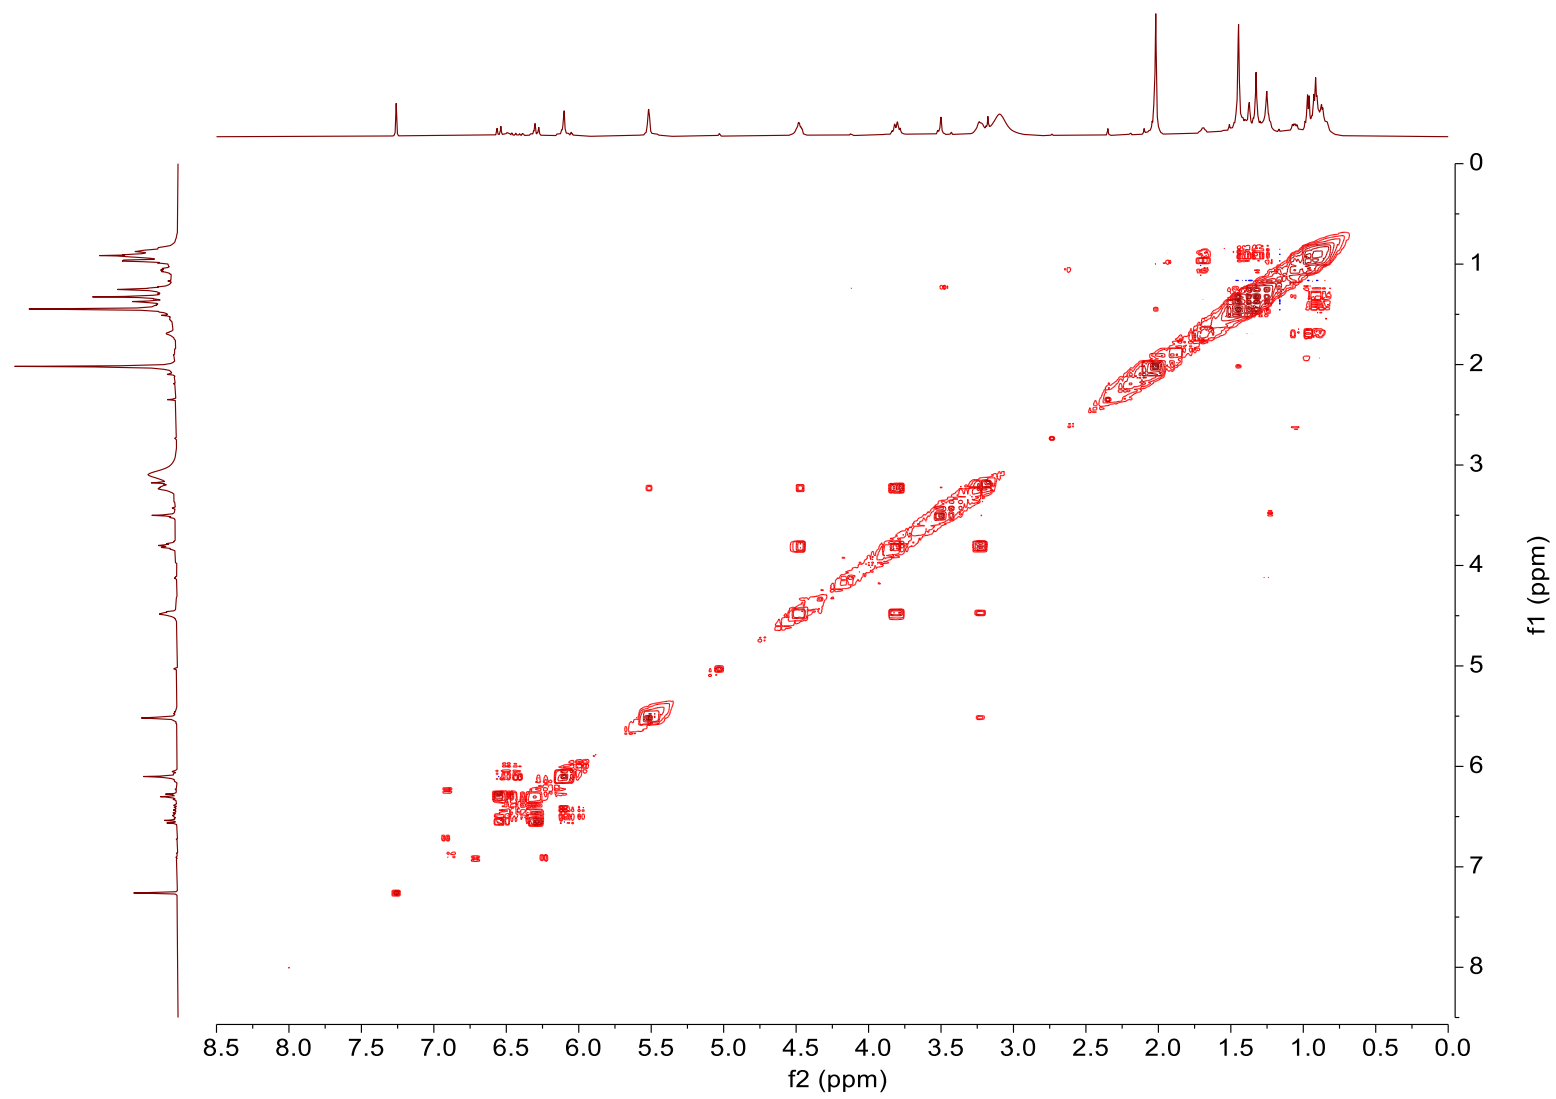

Figure S4 HSQC spectrum of **1**

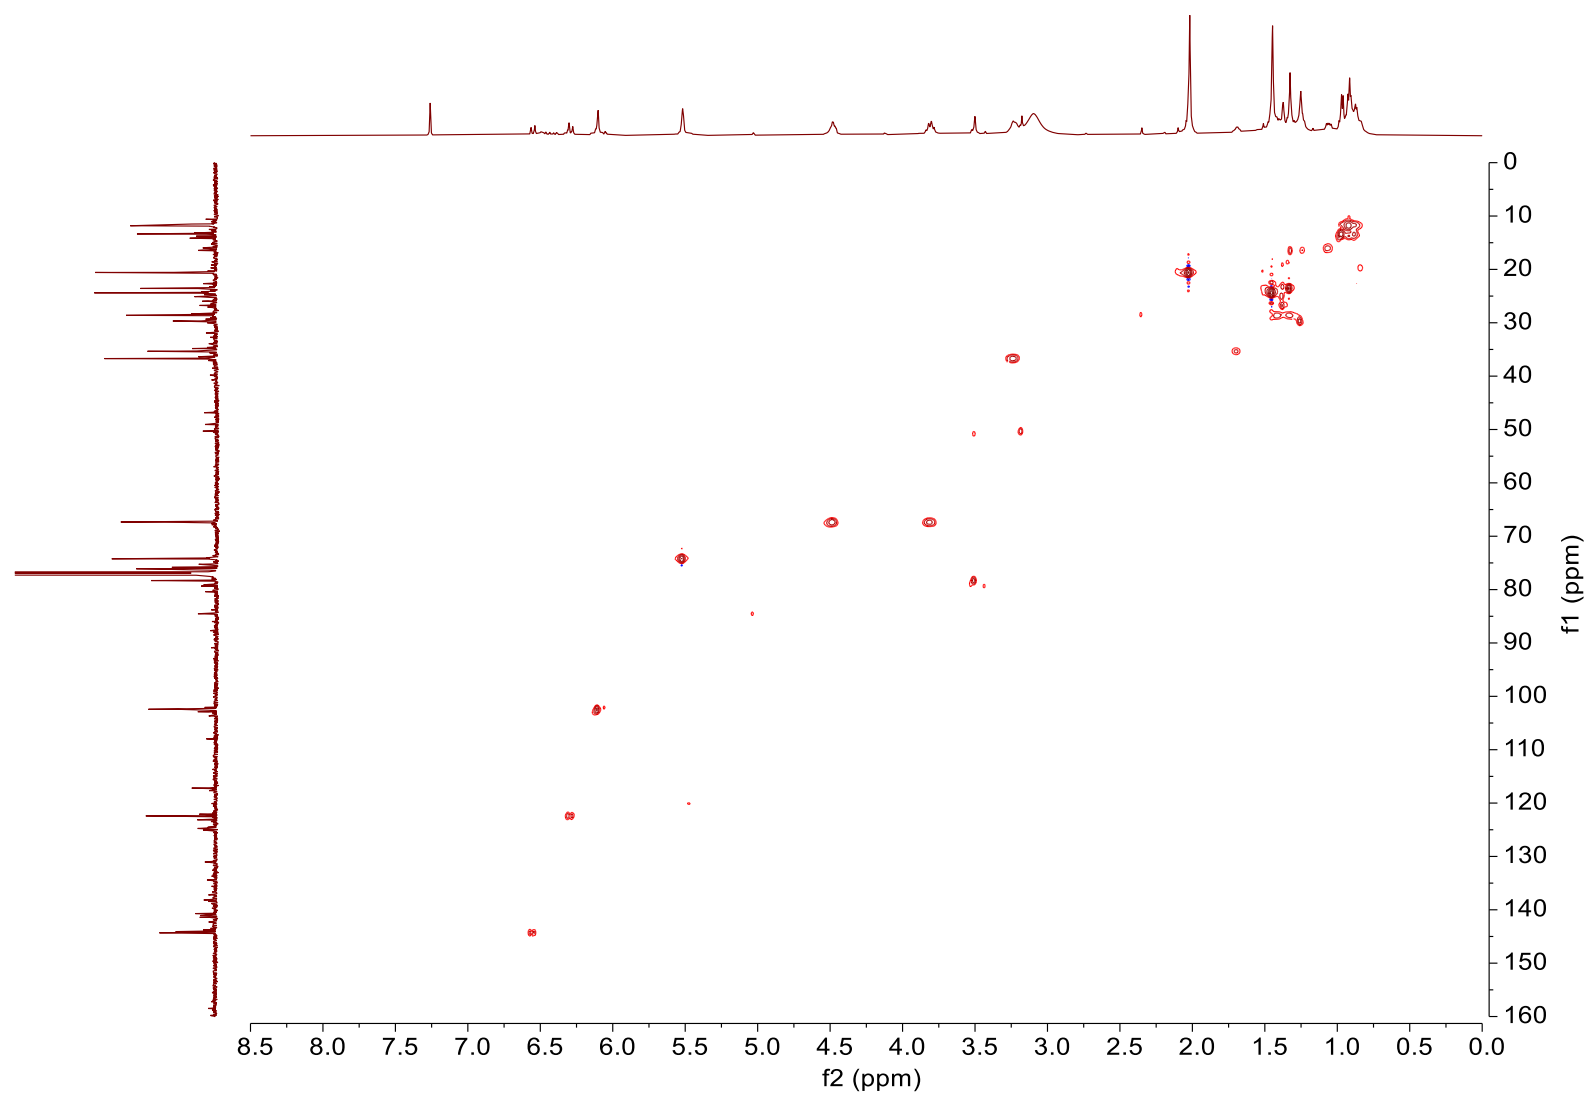

Figure S5 HMBC spectrum of **1**

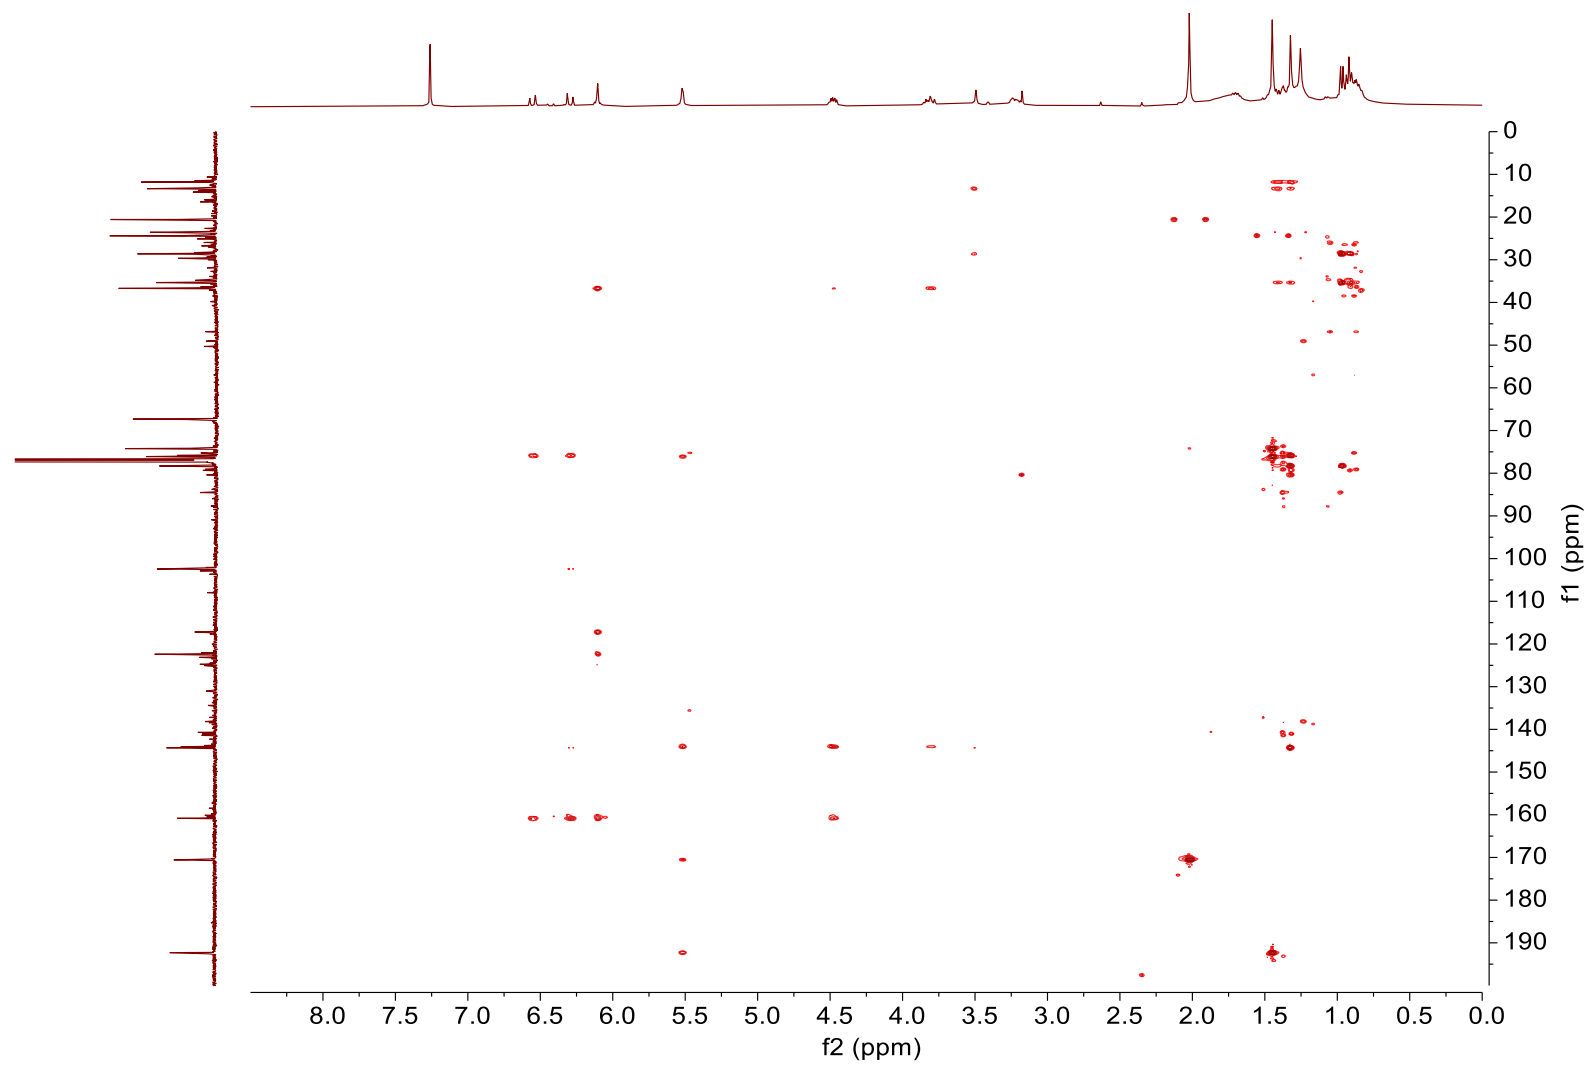

Figure S6 NOESY spectrum of **1**

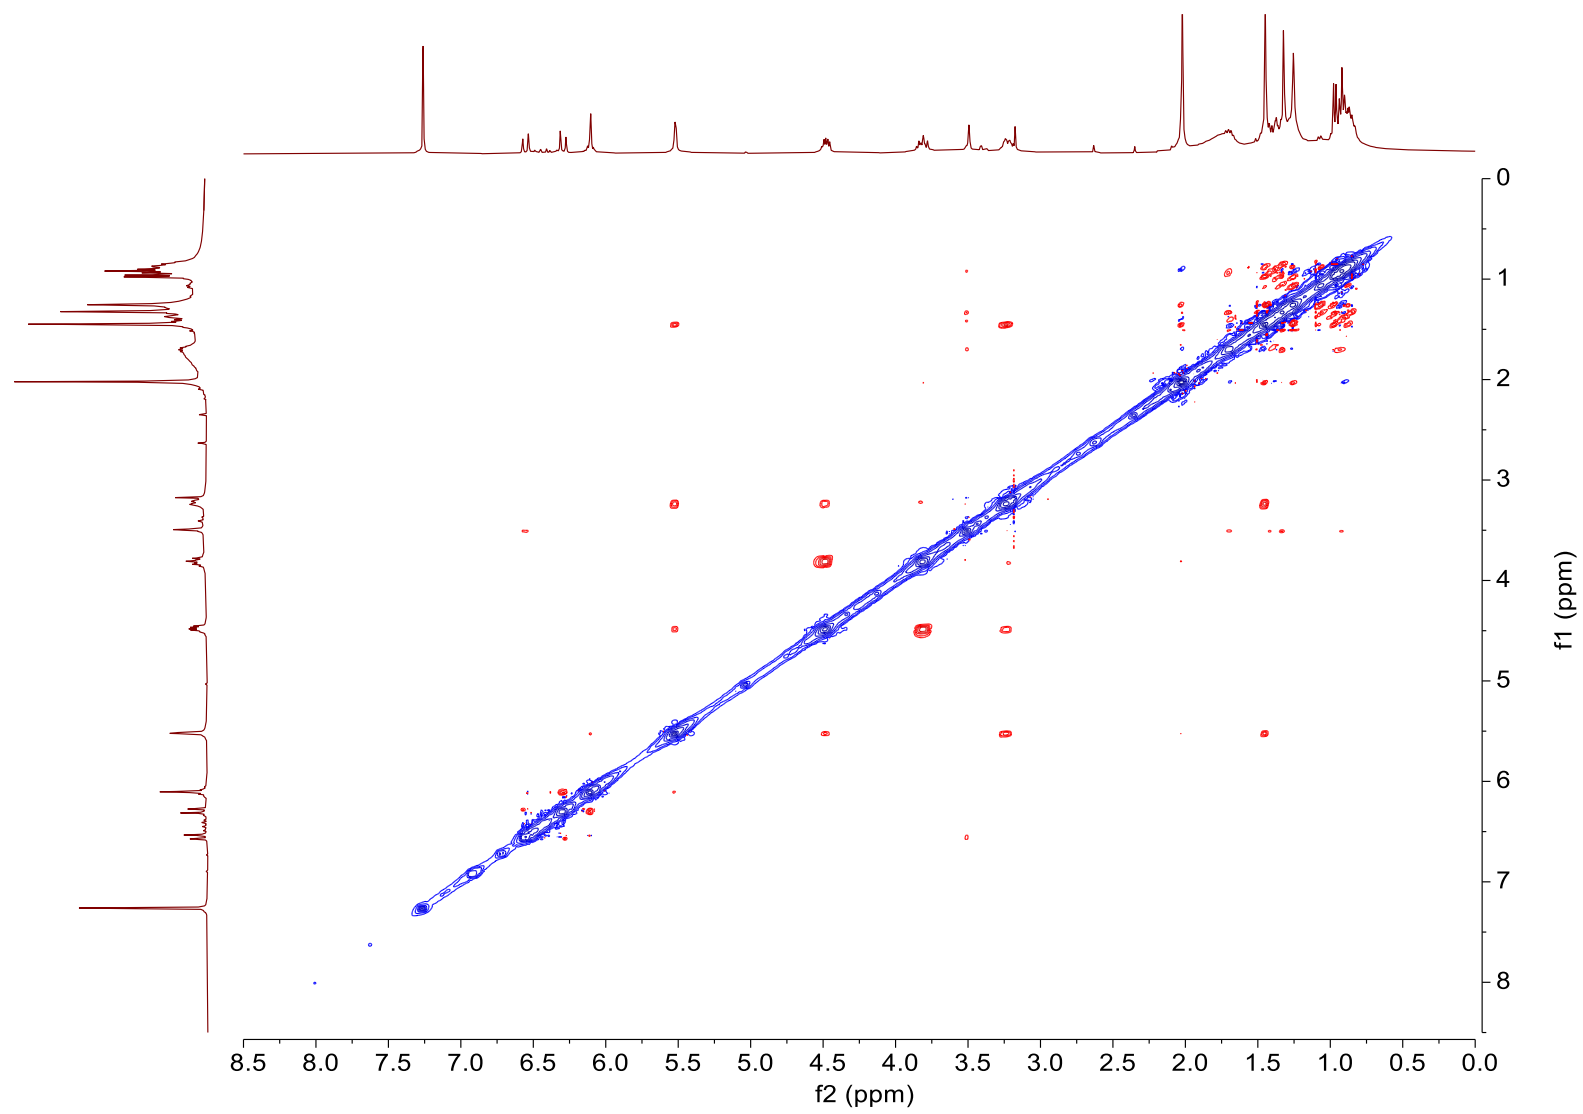

Figure S7  $^1\text{H}$  NMR spectrum of **2** ( $\text{CDCl}_3$ , 600 MHz)

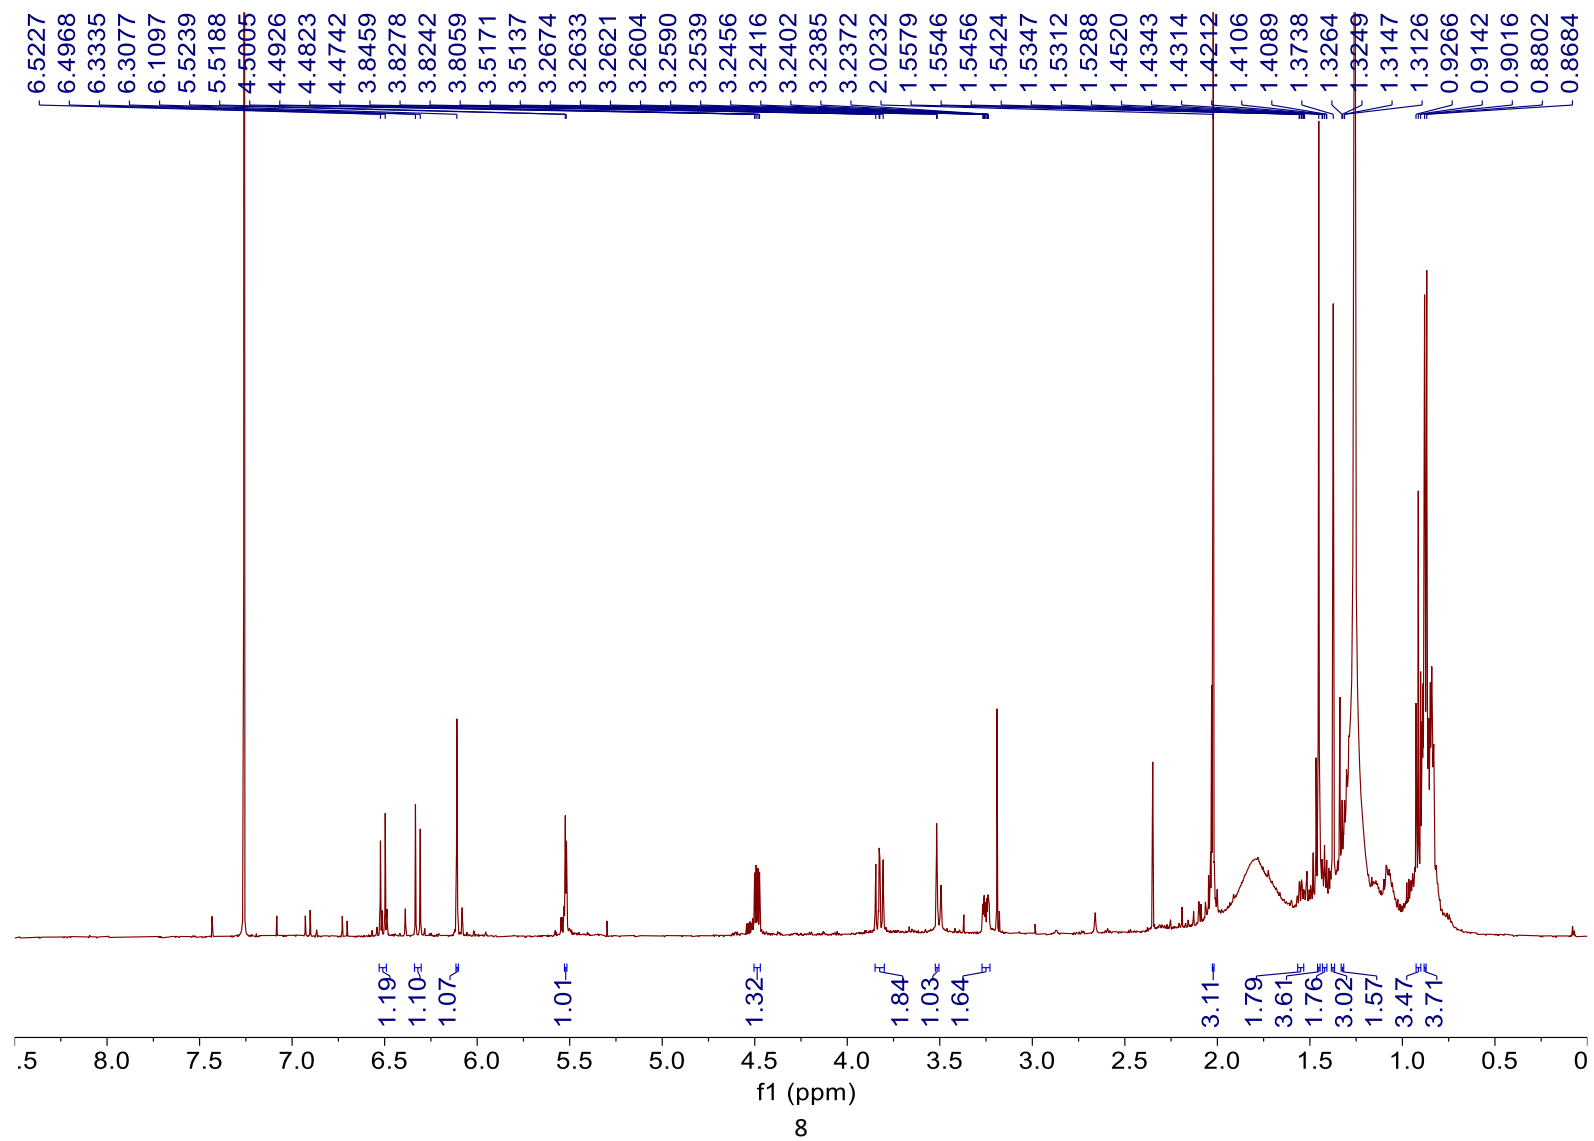



Figure S8  $^{13}\text{C}$  NMR and DEPT spectrum of **2** ( $\text{CDCl}_3$ , 150 MHz)

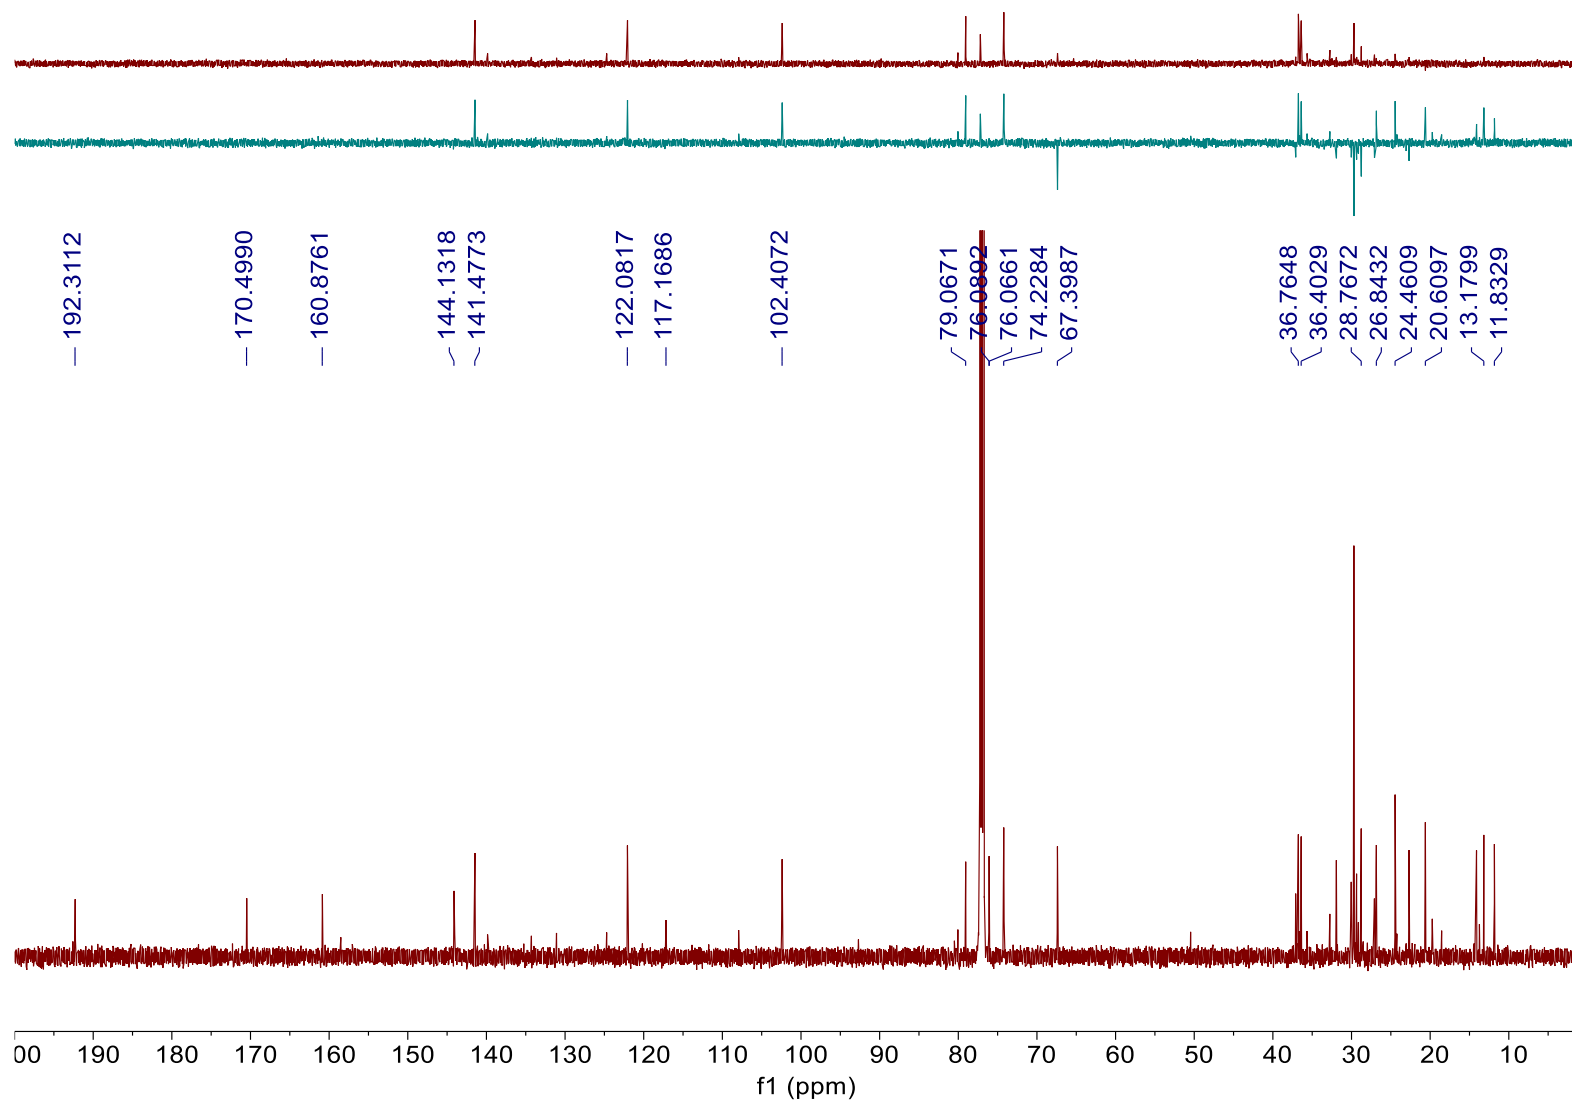

Figure S9 COSY spectrum of **2**

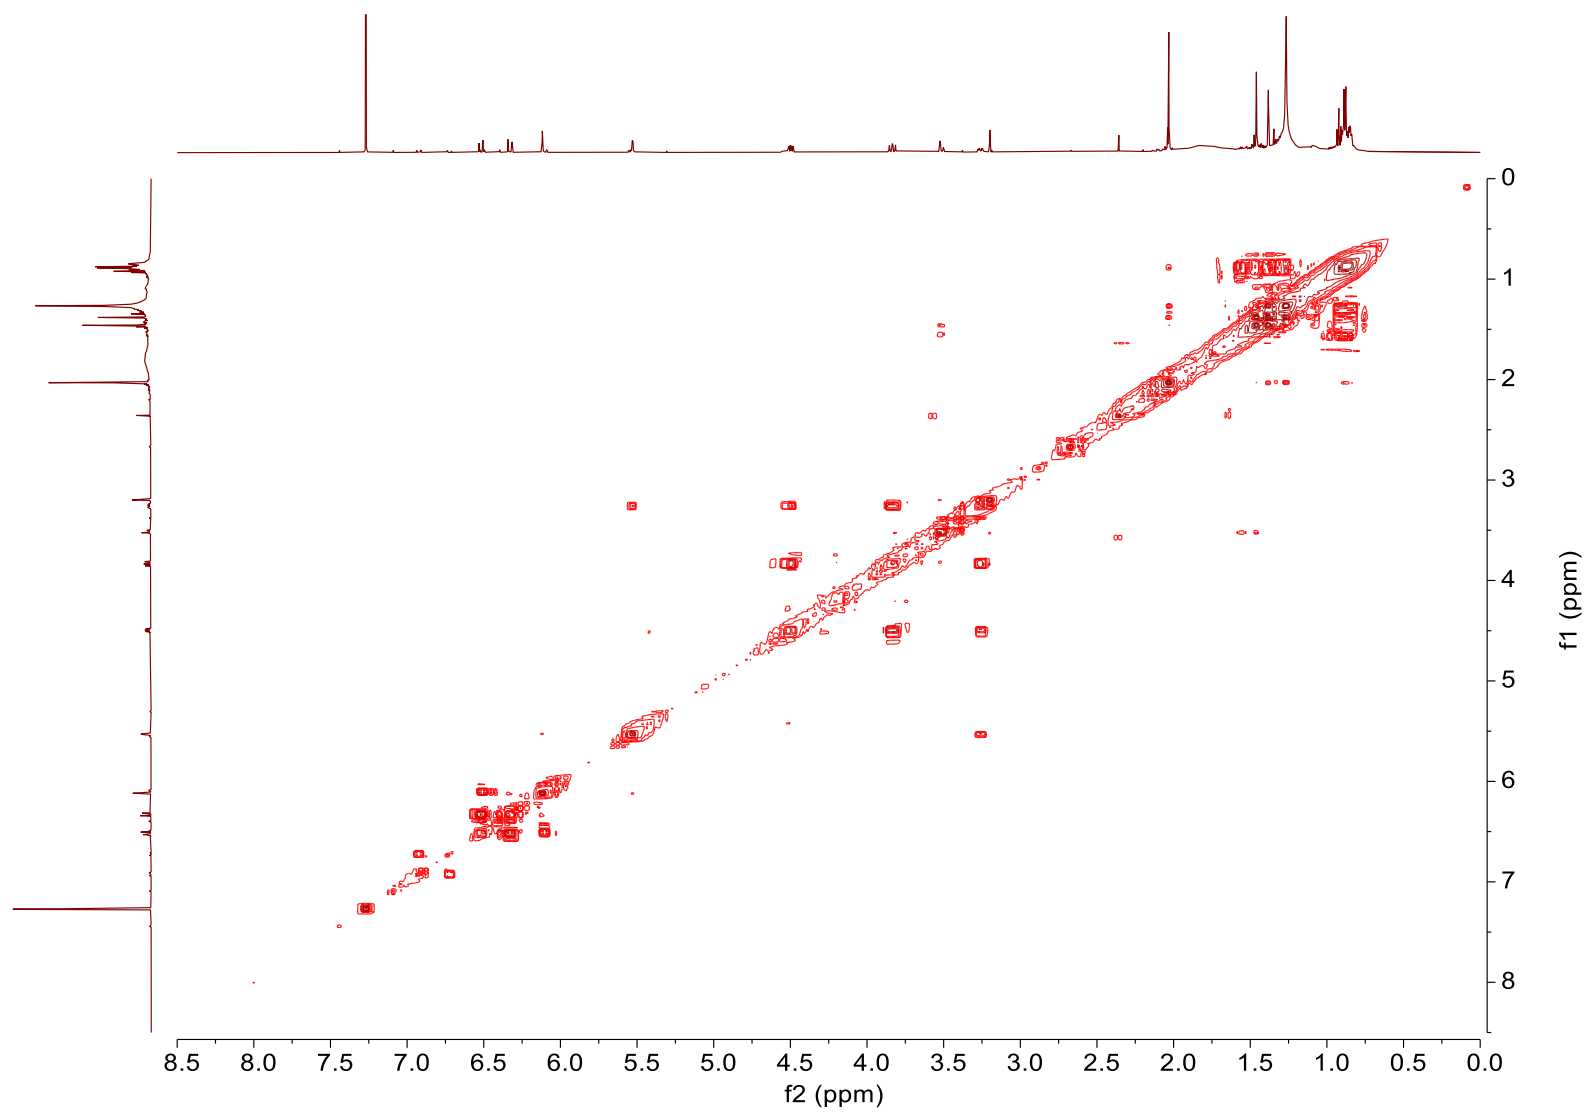

Figure S10 HSQC spectrum of 2

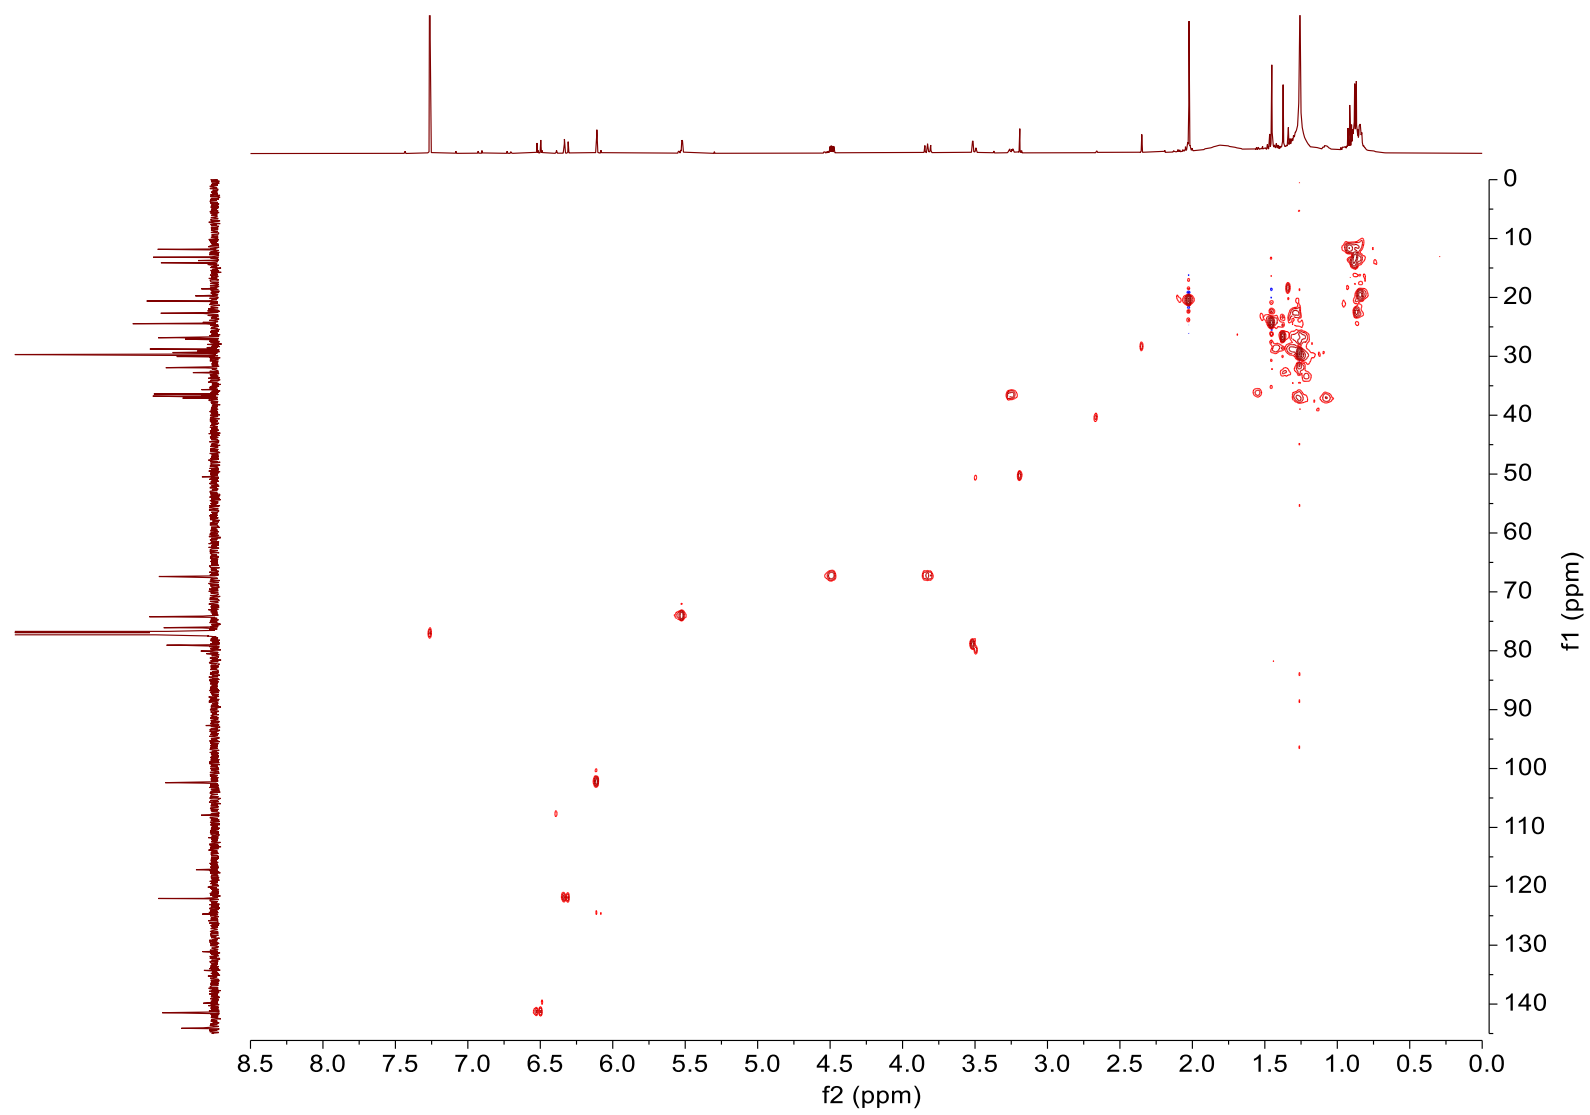

Figure S11 HMBC spectrum of **2**

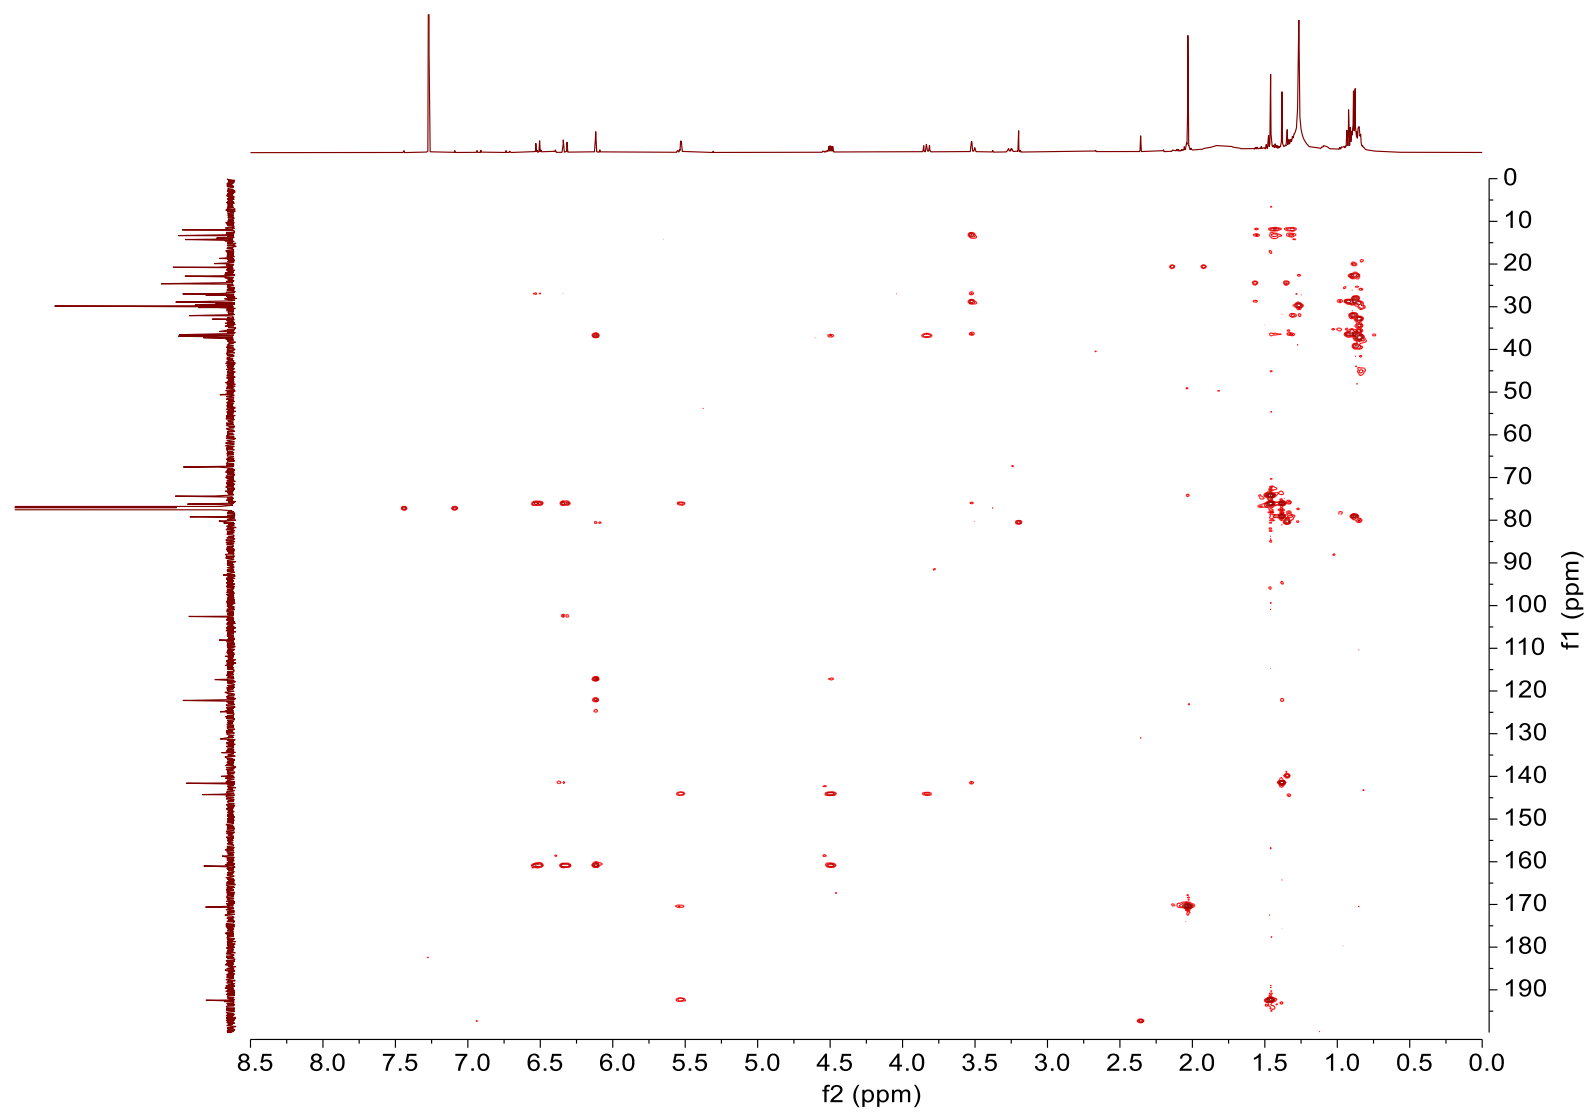

Figure S12 NOESY spectrum of **2**

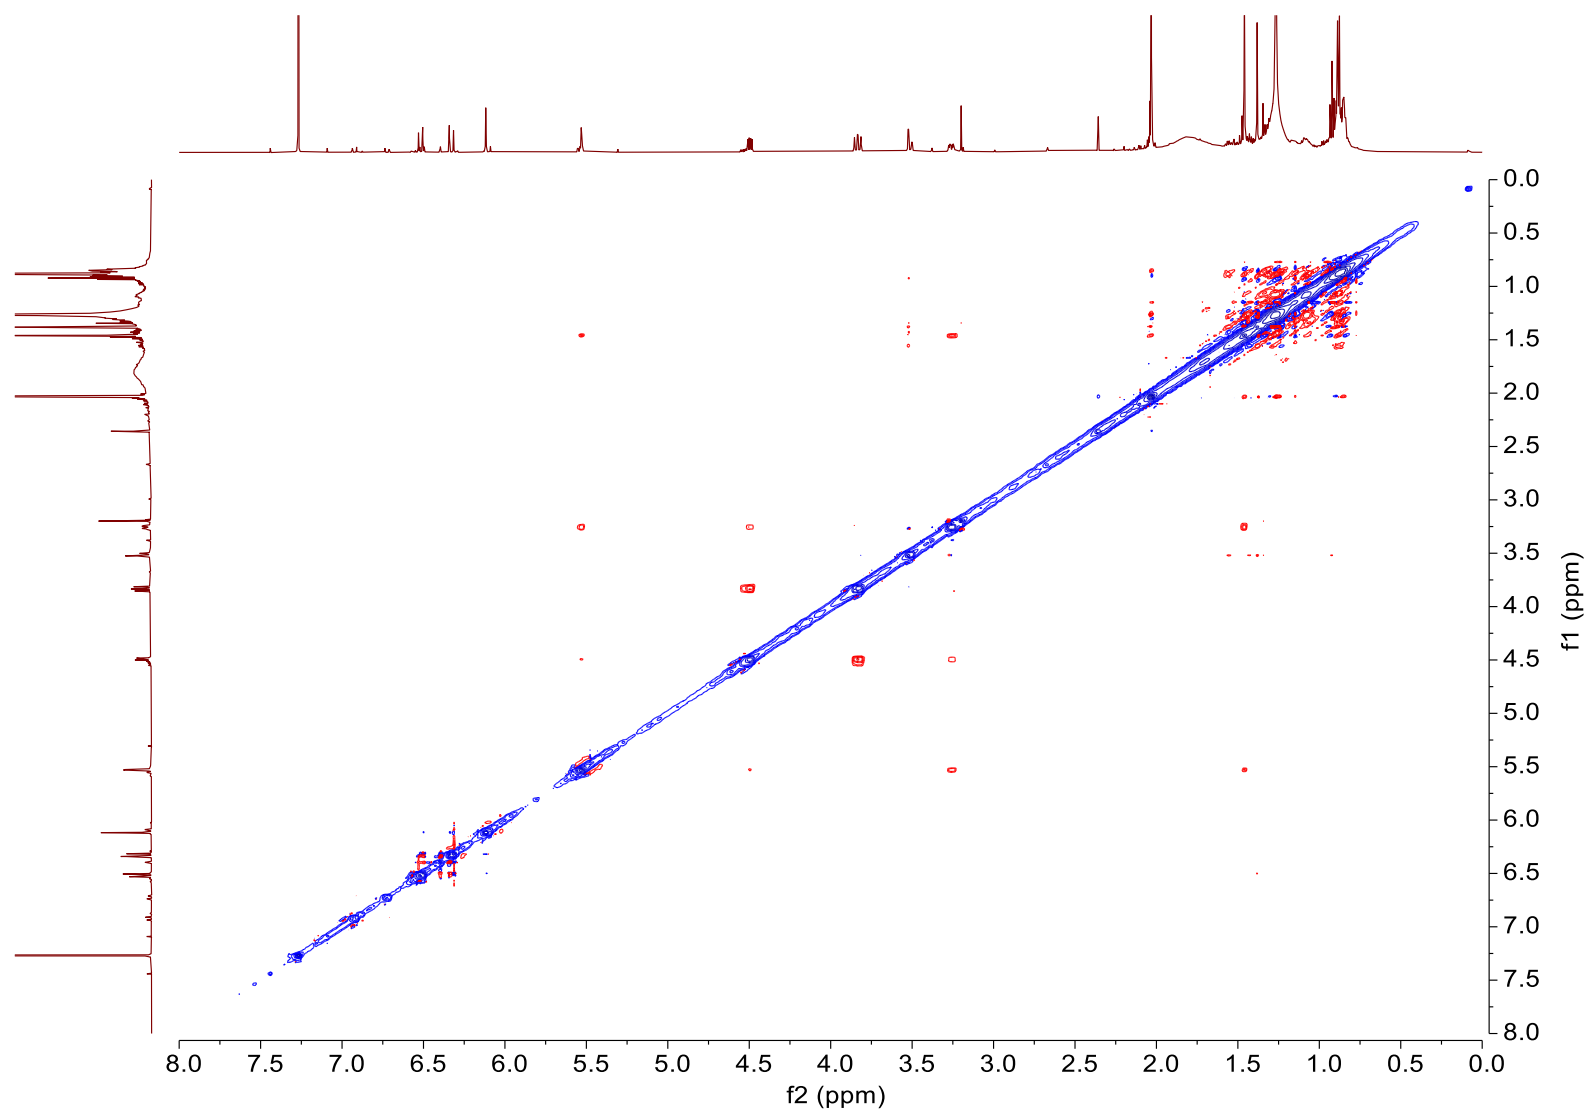

Figure S13 HRESIMS spectrum of **1**

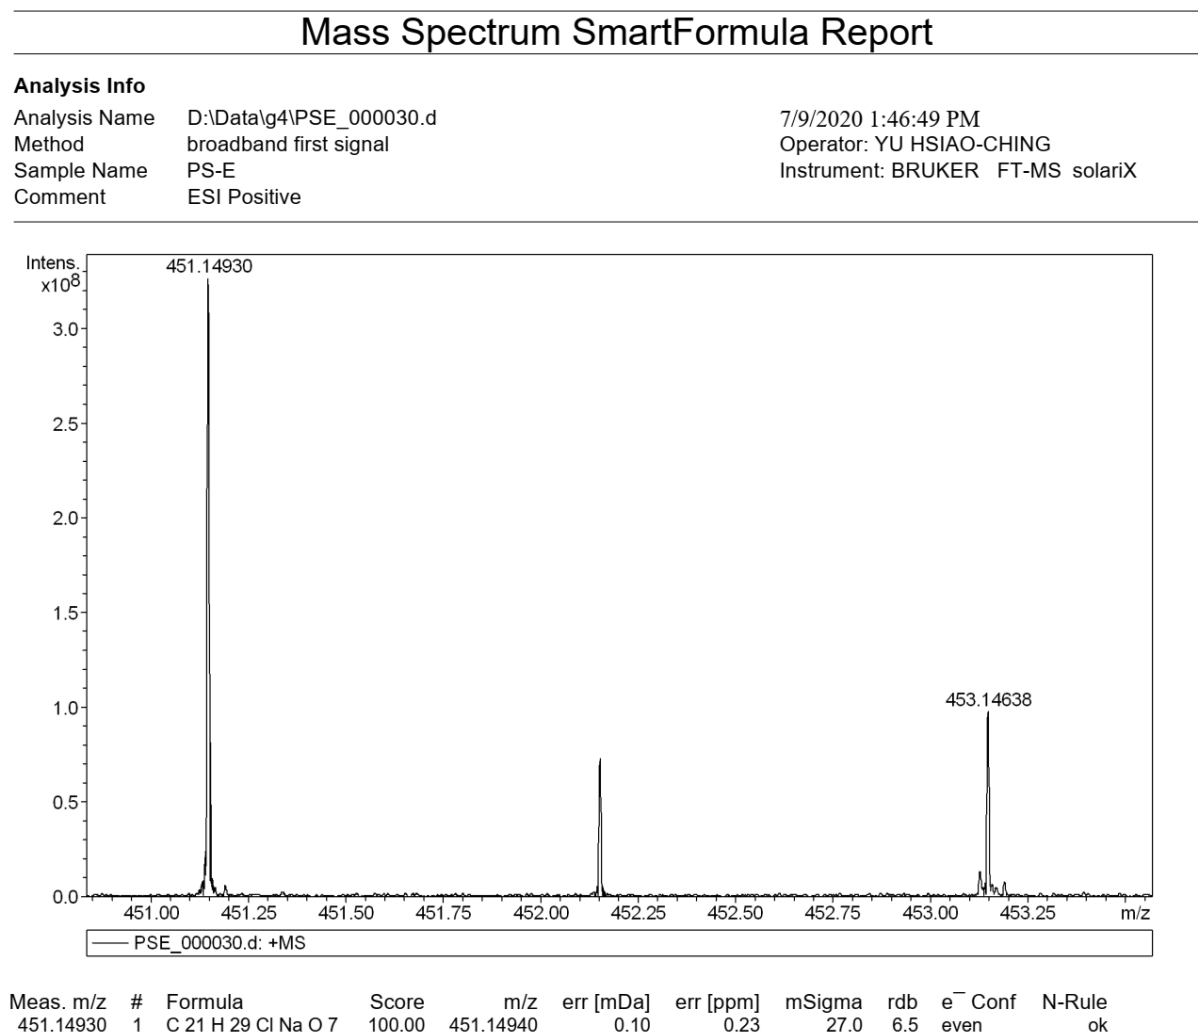

Figure S14 HRESIMS spectrum of **2**

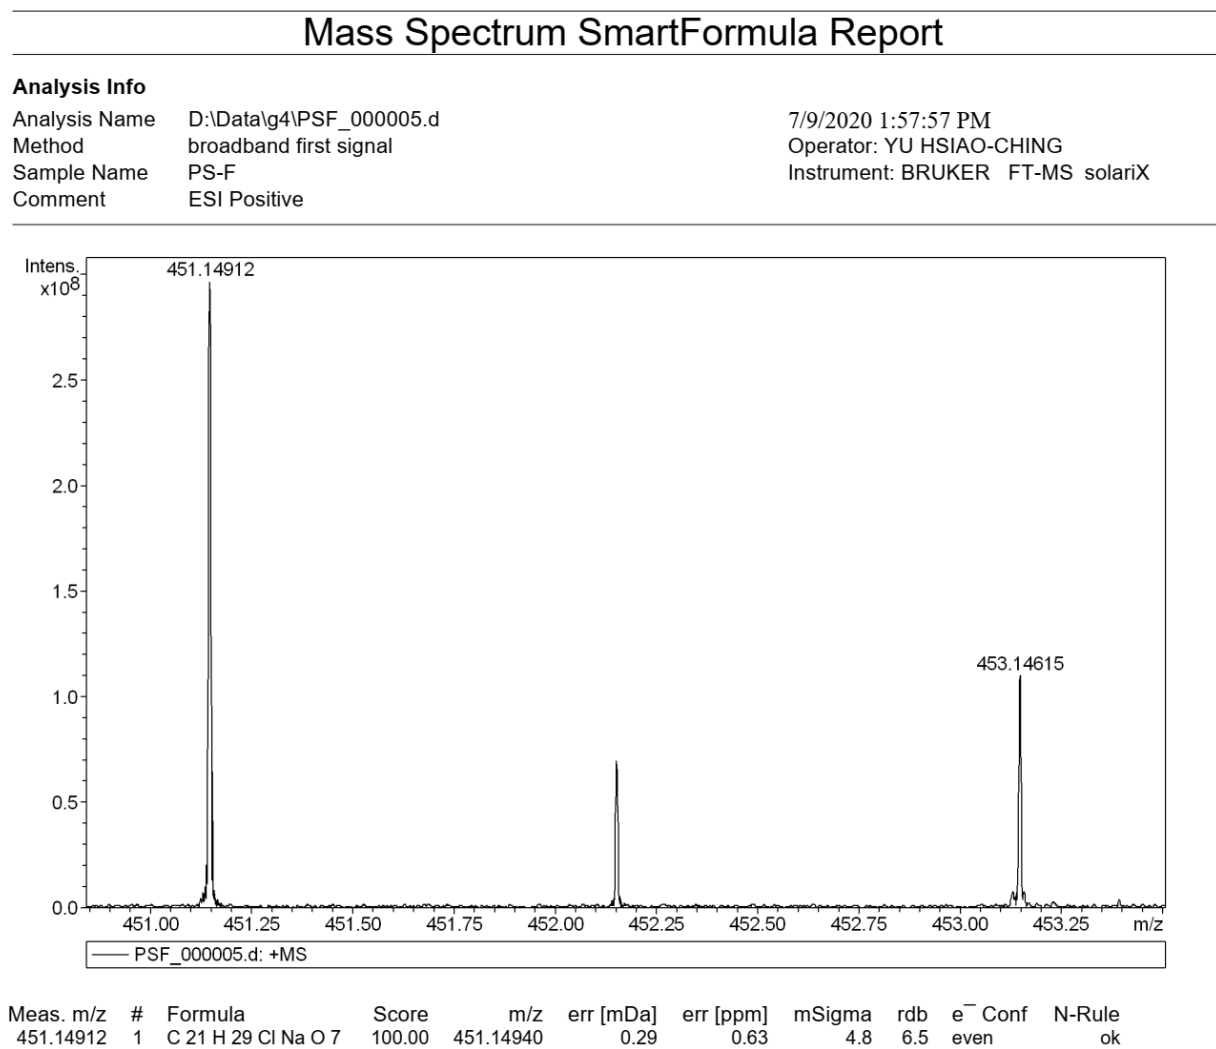

Table S1 the  $^1\text{H}$  and  $^{13}\text{C}$  data of the sidechain of compounds 1–4

| 1  |                    | 3               |                    | 2               |                    | 4               |                 |
|----|--------------------|-----------------|--------------------|-----------------|--------------------|-----------------|-----------------|
|    | $^1\text{H}$       | $^{13}\text{C}$ | $^1\text{H}$       | $^{13}\text{C}$ | $^1\text{H}$       | $^{13}\text{C}$ | $^{13}\text{C}$ |
| 9  | 6.30, d (15.5)     | 112.6           | 6.24 d, (15.5)     | 122.6           | 6.32, d (15.5)     | 112.2           | 122.5           |
| 10 | 6.55, d (15.5)     | 144.5           | 6.51 d, (15.5)     | 144.8           | 6.51, d (15.5)     | 141.6           | 141.3           |
| 11 |                    | 76.0            |                    | 76.1            |                    | 76.2            | 76.2            |
| 12 | 3.49, brs          | 78.5            | 3.47, brs          | 78.6            | 3.52, d (2.0)      | 79.2            | 79.4            |
| 13 | 1.70, m            | 35.5            | 1.69, m            | 35.4            | 1.55, m            | 36.6            | 35.7            |
| 14 | 1.33, m<br>1.41, m | 28.8            | 1.32, m<br>1.40, m | 28.8            | 1.31, m<br>1.42, m | 28.9            | 28.9            |
| 15 | 0.92, t (7.0)      | 12.0            | 0.90, t (7.3)      | 12.0            | 0.91, t (7.4)      | 12.0            | 12.0            |
| 16 | 0.97, d (6.8)      | 13.5            | 0.98, d (6.7)      | 13.5            | 0.88, d (7.0)      | 13.3            | 13.4            |
| 17 | 1.32, s            | 23.7            | 1.30, s            | 23.7            | 1.37, s            | 27.0            | 26.7            |

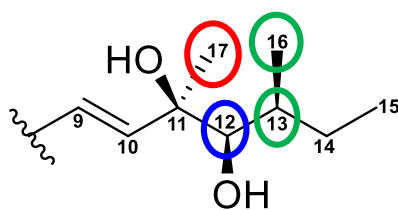

1 & 3

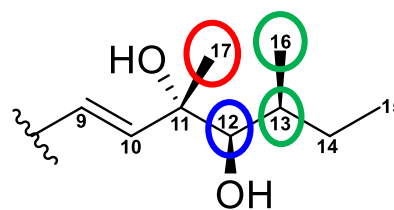

2 & 4



Figure S15 IR spectrum of **1**

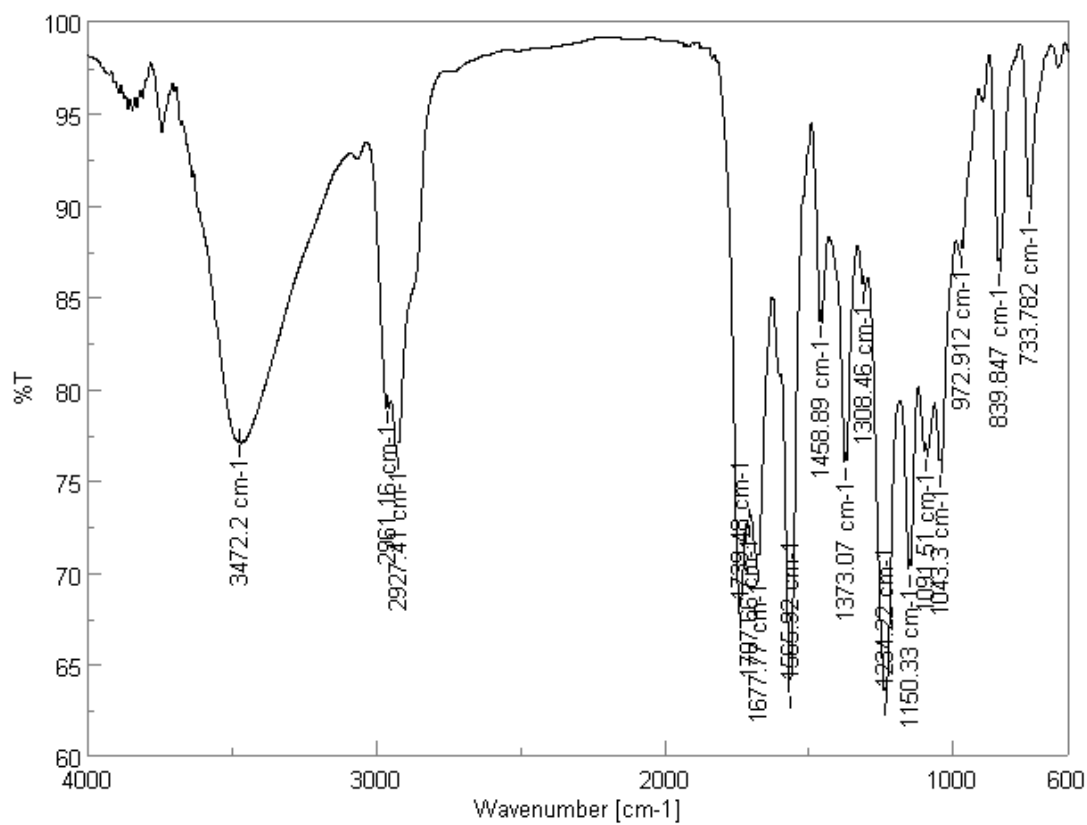

Figure S16 UV spectrum of **1**

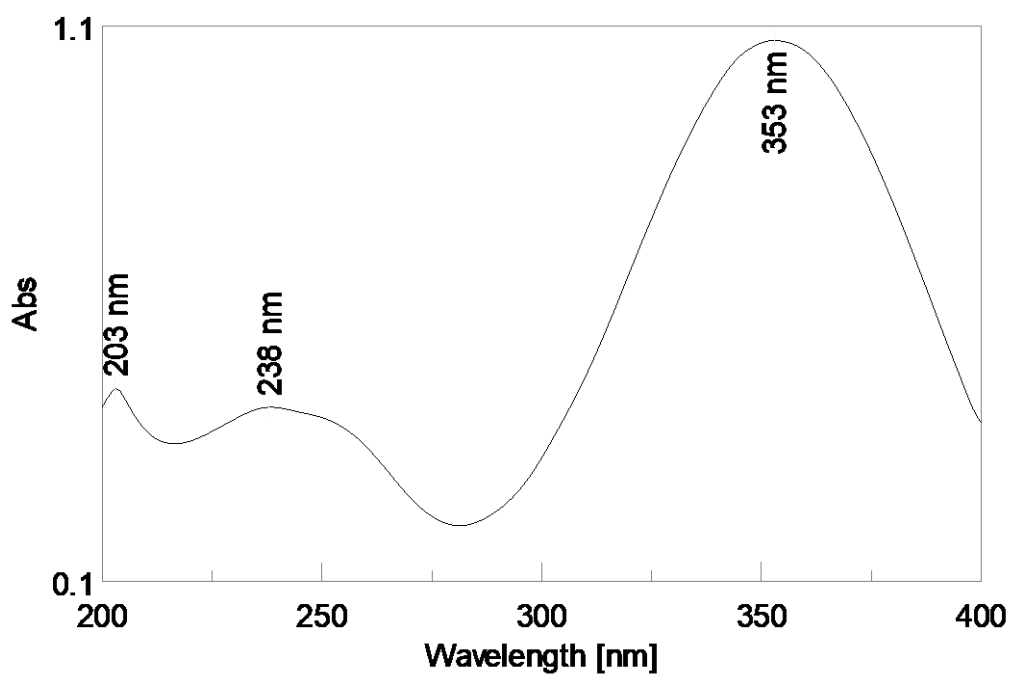

Figure S17 IR spectrum of **2**

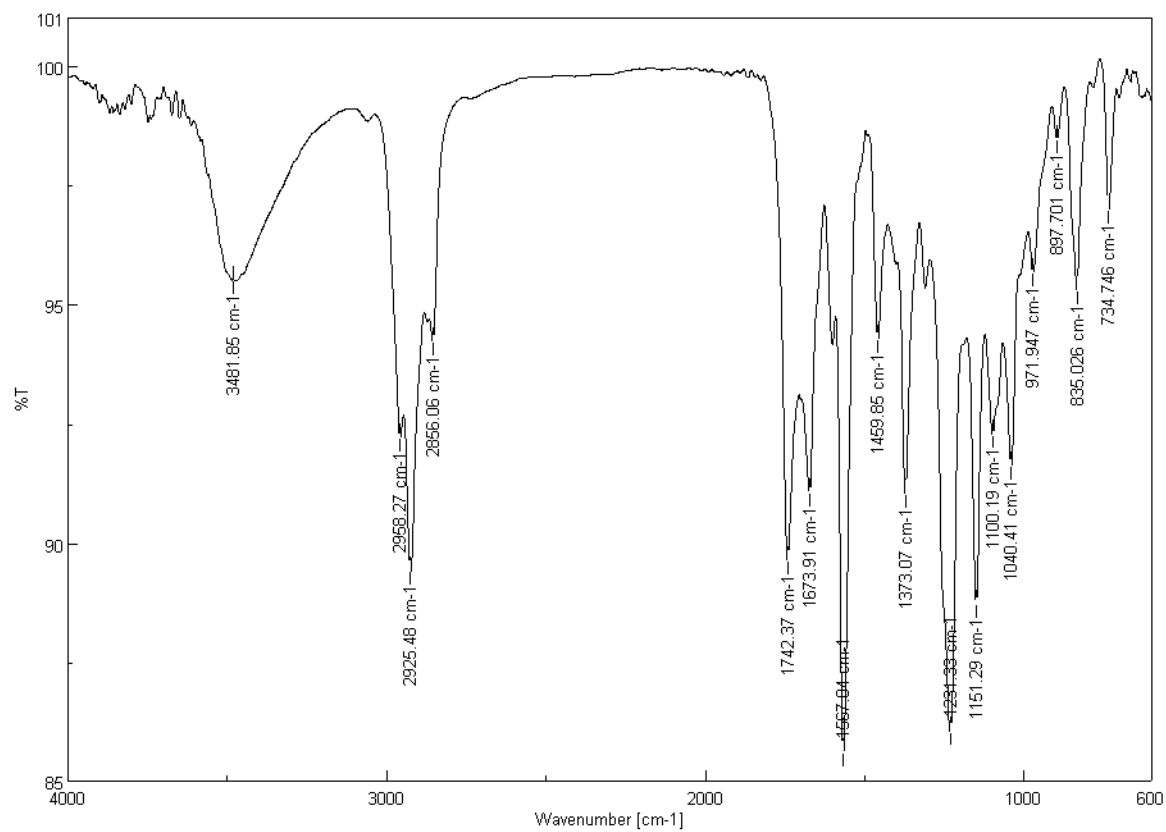

Figure S18 UV spectrum of **2**

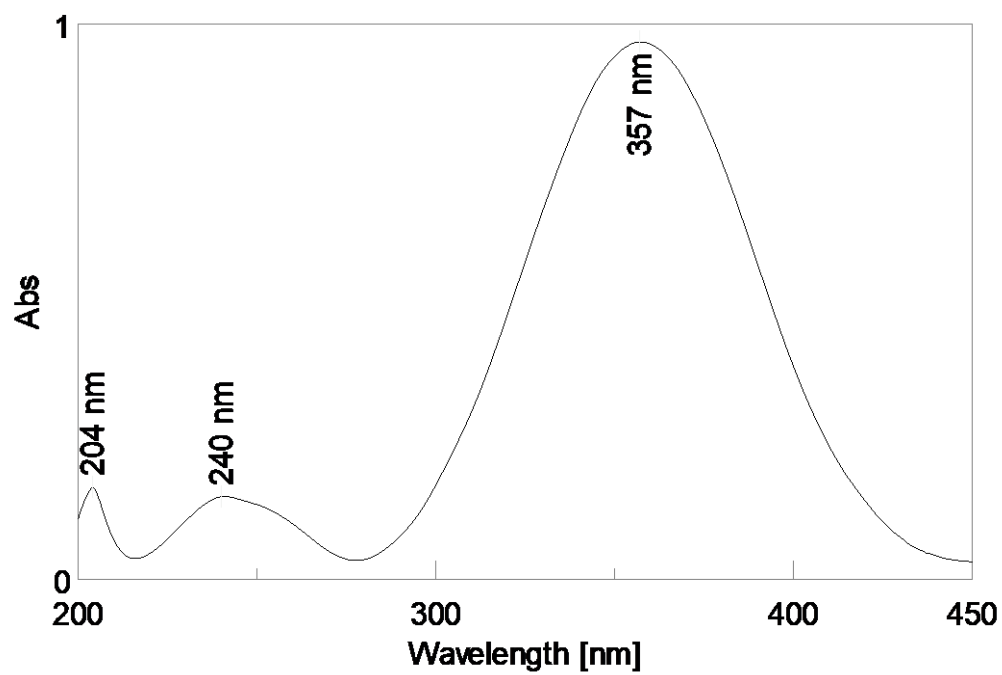

Supplement: s1 [file s1]
